# Supplementary material for: Preparation of hydrophilic surface-imprinted ionic liquid polymer on multi-walled carbon nanotubes for the sensitive electrochemical determination of imidacloprid
Source: Royal Society of Chemistry journal article supplement (doi:10.1039/c6ra25969c), 2017-01-01
Supplement: c6ra25969c1.pdf [file c6ra25969c1.pdf]

## Supplementary Information

### Preparation of hydrophilic surface-imprinted ionic liquid polymer on multi-walled carbon nanotubes for the sensitive electrochemical determination of imidacloprid

*Lijuan Zhao, Juan Yang, Huili Ye, Faqiong Zhao\*, Baizhao Zeng*

Key Laboratory of Analytical Chemistry for Biology and Medicine (Ministry of Education), College of Chemistry and Molecular Sciences, Wuhan University, Wuhan 430072, Hubei Province, P. R. China

#### 1.1 Preparation of 1-MA-3VI-Br

1-MA-3VI-Br was prepared according to the literature with some modification.<sup>1</sup> 2-(Bromomethyl)acrylic acid (495 mg, 3 mmol) was slowly added to 10 mL round bottom flask with 1-vinylimidazolium (307 mg, 3.27 mmol), and then let them react under 70 °C for 24 h. The resulting mixture was washed with ether. Finally, the product was dried under vacuum at 60 °C for overnight. <sup>1</sup>HNMR (300 MHz, DMSO),  $\delta$  4.90 (d, 2H, CH<sub>2</sub>), 5.08 (s, 2H, CH<sub>2</sub>), 6.00 (s, 1H, =CH), 6.05 (m, 1H, CC\*CCH<sub>2</sub>), 6.36 (s, 1H, =CH), 7.78 (2H, d, NC\*HCHN), 9.30 (1H, s, NC\*HN).

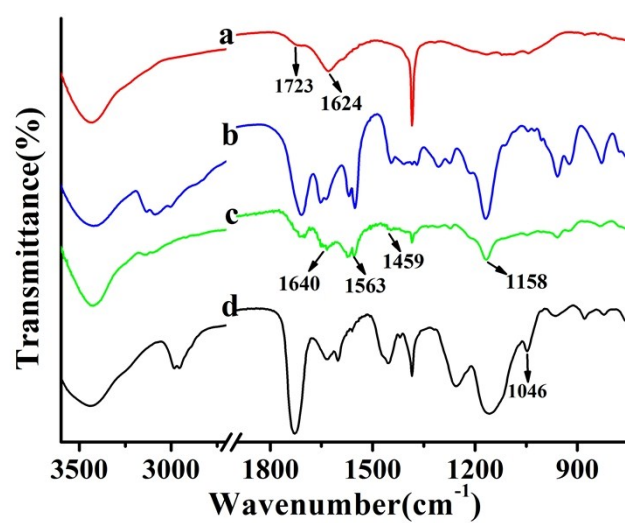

**Fig. S1.** FT-IR spectra of MWNTs-COOH (a), 1-MA-3VI-Br (b), MWNTs-IL (c) and MWNTs@RAFT-MIP (d).

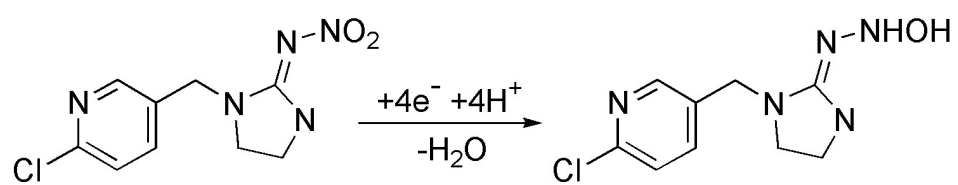

**Fig. S2.** Electrochemical reaction mechanism of imidacloprid.

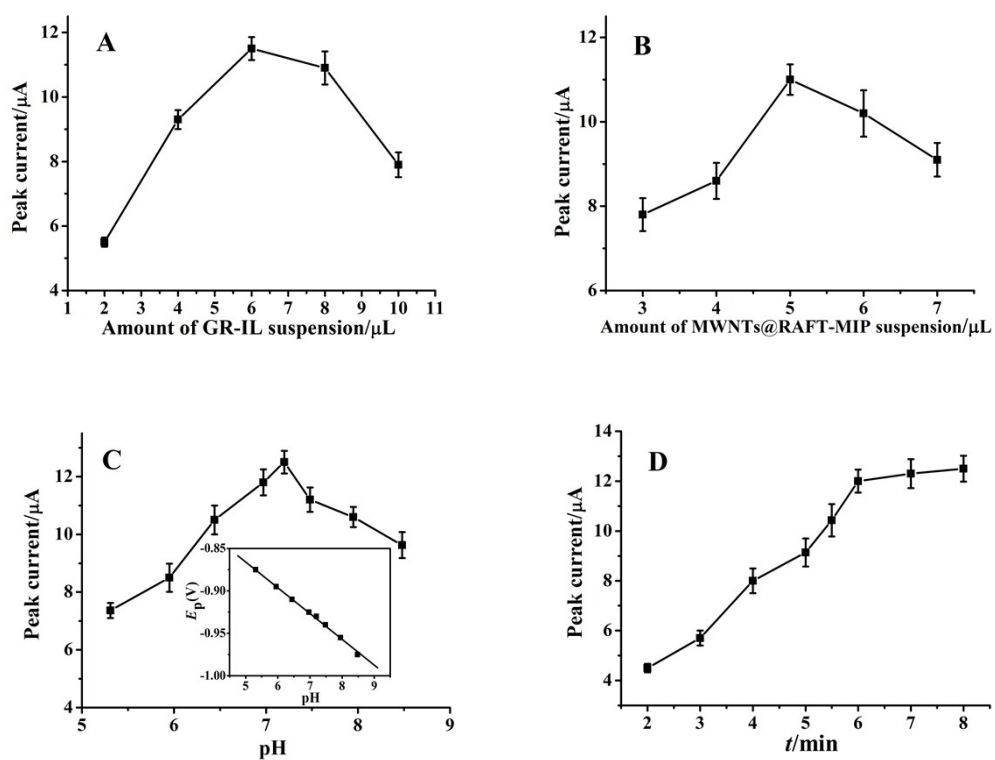

**Fig. S3.** Optimization of different conditions. (A) Influence of the amount of GR-IL; (B) influence of the amount of MWNTs@RAFT-MIP; (C) influence of solution pH, inset: the plot of peak potential versus pH; (D) influence of accumulation time. Imidacloprid concentration: 5.0  $\mu\text{M}$ .

**Table S1** Comparison of different electrochemical sensors for imidacloprid detection

| Electrochemical sensors                              |                                 |                     | Sensitivity<br>( $\mu\text{A}/\mu\text{M mm}^2$ ) | Linear<br>range<br>( $\mu\text{M}$ ) | Detection<br>limit ( $\mu\text{M}$ ) | References   |
|------------------------------------------------------|---------------------------------|---------------------|---------------------------------------------------|--------------------------------------|--------------------------------------|--------------|
| $\beta$ -Cyclodextrin<br>functionalized<br>electrode | r-GO                            | polymer<br>modified | -                                                 | 0.05–15                              | 0.02                                 | <sup>2</sup> |
| Nano silver<br>composite modified                    | Nafion/nano<br>TiO <sub>2</sub> | Nafion              | -                                                 | 0.5–3.5                              | 0.25                                 | <sup>3</sup> |
| Imprinted PoPD<br>modified electrode                 | membranes at                    | RGO                 | 0.15                                              | 0.75–70                              | 0.04                                 | <sup>4</sup> |
| Poly(carbazole)/<br>graphene oxide modified          | chemically reduced              | GCE                 | 0.006                                             | 3–10                                 | 0.44                                 | <sup>5</sup> |
| Activated glassy carbon electrode                    |                                 |                     | -                                                 | 4–20                                 | 0.61                                 | <sup>6</sup> |
| Water-compatible<br>polymer modified                 | surface-imprinted               | GR-IL electrode     | 0.71                                              | 0.2–24                               | 0.08                                 | This work    |

## Reference

1. Y. Zhang, Y. Shen, J. Yuan, D. Han, Z. Wang, Q. Zhang, L. Niu, *Angew. Chem. Int. Ed.*, 2006, **45**, 5867-5870.
2. M. Chen, Y. Meng, W. Zhang, J. Zhou, J. Xie and G. Diao, *Electrochim. Acta.*, 2013, **108**, 1-9.
3. A. Kumaravel and M. Chandrasekaran, *Sens. Actuators, B.*, 2011, **158**, 319-326.
4. L. Kong, X. Jiang, Y. Zeng, T. Zhou and G. Shi, *Sens. Actuators, B.*, 2013, **185**, 424-431.
5. W. Lei, Q. Wu, W. Si, Z. Gu, Y. Zhang, J. Deng and Q. Hao, *Sens. Actuators, B.*, 2013, **183**, 102-109.
6. W. Si, Z. Han, W. Lei, Q. Wu, Y. Zhang, M. Xia and Q. Hao, *J. Electroanal. Chem.*, 2013, **161**, B9-B13.
